# Supplementary material
Source: PubMed Central journal article supplement (PMC3659360)

Supplementary Fig. 1 Treatment with R-spondin2 and Wnt5b stimulated the canonical Wnt signaling pathway in vitro. Ovarian somatic cells were transfected with the TCF-luciferase reporter plasmid for 6 h before treatment with different reagents for 18h. C: control; Rspo2: R-spondin2 (30 ng/ml); Wnt3a: 30 ng/ml; Wnt5b: 3-100 ng/ml. N=4.

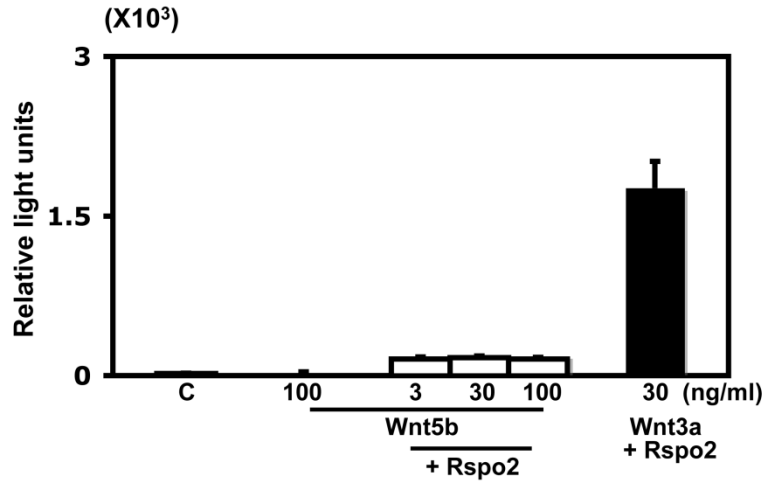

Supplement: supp_fj.12-223412_12-223412SuppData.pdf [file supp_fj.12-223412_12-223412SuppData.pdf]
